# Supplementary material for: A standardized framework to evaluate the quality of studies using TDABC in healthcare: The TDABC in Healthcare Consortium Consensus Statement
Source: Research Square preprint supplement (doi:10.21203/rs.3.rs-33107/v3), 2020-10-22
Supplement: Supplementary file 1 [file ec9a686c2a6d0baab24d7dd6.docx]

**Appendix I**

<https://forms.gle/b38VGT8Frm4ED7yCA>
